# Supplementary material
Source: Springer Nature journal article supplement (https://www.springermedizin.de/resource/supplementary/13049_2013_706_MOESM1_ESM.pdf/9666940)
Supplement: MOESM1 [file 9666940]

# Pre-hospital Advanced Airway Management in the Central Denmark Region

## 1) Background

|                                                           |                                    |                                  |
|-----------------------------------------------------------|------------------------------------|----------------------------------|
| Pre-hospital critical care team                           | <input type="checkbox"/> Aarhus    | <input type="checkbox"/> Randers |
|                                                           | <input type="checkbox"/> Horsens   | <input type="checkbox"/> Grenå   |
|                                                           | <input type="checkbox"/> Silkeborg | <input type="checkbox"/> Lemvig  |
|                                                           | <input type="checkbox"/> Viborg    | <input type="checkbox"/> Karup   |
| Attending doctor a consultant                             | <input type="checkbox"/> Yes       | <input type="checkbox"/> No      |
| Doctor's experience in pre-hospital critical care (years) |                                    |                                  |

## 2) Alarm data

|                                   |                  |
|-----------------------------------|------------------|
| Date                              | _____ (dd.mm.yy) |
| Time of the alarm                 | _____ : _____    |
| Time on scene, EMS                | _____ : _____    |
| Time on scene, critical care team | _____ : _____    |
| Time at hospital                  | _____ : _____    |

## 3) Patient data:

|                                     |       |
|-------------------------------------|-------|
| Social security number              | _____ |
| ASA- score (prior to current event) | _____ |
| Co-morbidity                        | _____ |

## 4) Patient category (more than one alternative may be checked)

|                    |                                                                                                                                                                                                                                                                     |
|--------------------|---------------------------------------------------------------------------------------------------------------------------------------------------------------------------------------------------------------------------------------------------------------------|
| Blunt trauma       | <input type="checkbox"/> Traumatic brain injury<br><input type="checkbox"/> Multitrauma<br><input type="checkbox"/> Strangulation<br><input type="checkbox"/> Burns<br><input type="checkbox"/> Other blunt trauma                                                  |
| Penetrating trauma | <input type="checkbox"/>                                                                                                                                                                                                                                            |
| Non-trauma patient | <input type="checkbox"/> Cardiac arrest (CA)<br><input type="checkbox"/> Cardiological disease (non-CA)<br><input type="checkbox"/> Asthma / COPD<br><input type="checkbox"/> ENT<br><input type="checkbox"/> SAH / stroke<br><input type="checkbox"/> Other: _____ |

### 5) First registered vital signs

|                          |                                      |      |                          |
|--------------------------|--------------------------------------|------|--------------------------|
| Respiratory rate         | _____                                | /min |                          |
| SpO <sub>2</sub>         | _____                                | %    |                          |
|                          | With supplementary O <sub>2</sub>    |      | <input type="checkbox"/> |
|                          | Without supplementary O <sub>2</sub> |      | <input type="checkbox"/> |
| Heart rate               | _____                                | /min |                          |
| Systolic blood pressure  | _____                                | mmHg |                          |
| Glasgow Coma Scale Score | _____                                |      |                          |

### 6) Indication for advanced airway management (more than one alternative may be checked)

|                                                                                    |
|------------------------------------------------------------------------------------|
| <input type="checkbox"/> Reduced level of consciousness                            |
| <input type="checkbox"/> Hypoxia                                                   |
| <input type="checkbox"/> Ineffective ventilation                                   |
| <input type="checkbox"/> Existing airway obstruction                               |
| <input type="checkbox"/> Impending airway obstruction                              |
| <input type="checkbox"/> Anaesthesia because of combative or uncooperative patient |
| <input type="checkbox"/> Anaesthesia to reduce pain or stress                      |
| <input type="checkbox"/> Cardiac arrest                                            |
| <input type="checkbox"/> Other (please specify) _____                              |

### 7) Airway evaluation (more than one alternative may be checked)

|                                                                                              |
|----------------------------------------------------------------------------------------------|
| <input type="checkbox"/> Prior difficult airway management                                   |
| <input type="checkbox"/> Severe obesity                                                      |
| <input type="checkbox"/> Malampati score > 2                                                 |
| <input type="checkbox"/> Small mouth (< 4 cm in adults)                                      |
| <input type="checkbox"/> Under-bite impossible                                               |
| <input type="checkbox"/> Reduced neck mobility (< 90 grader) including in-line stabilisation |
| <input type="checkbox"/> Short thyo-mental distance (< 3 fingers)                            |
| <input type="checkbox"/> Significant airway trauma                                           |
| <input type="checkbox"/> Other (please specify) _____                                        |
| <input type="checkbox"/> Airway evaluation not performed                                     |

**8) "Plan A" for airway management** (only one check, please)

|                         |                                                                                                                                                                                                                                                 |
|-------------------------|-------------------------------------------------------------------------------------------------------------------------------------------------------------------------------------------------------------------------------------------------|
| Spontaneous respiration | <input type="checkbox"/> No assistance (with / without supplementary O <sub>2</sub> )<br><input type="checkbox"/> With chin-lift or jaw-trust<br><input type="checkbox"/> With oropharyngeal- / nasopharyngeal airway                           |
| Bag-mask-ventilation    | <input type="checkbox"/> Without adjuncts<br><input type="checkbox"/> With oropharyngeal- / nasopharyngeal airway                                                                                                                               |
| Laryngeal mask          | <input type="checkbox"/> Standard<br><input type="checkbox"/> Intubation laryngeal mask ("Fasttrach")                                                                                                                                           |
| Oral intubation         | <input type="checkbox"/> Standard laryngoscopy without stylet<br><input type="checkbox"/> Standard laryngoscopy with stylet<br><input type="checkbox"/> Standard laryngoscopy with "Gum - Elastic - Bougie"<br><input type="checkbox"/> Airtraq |
| Other                   | <input type="checkbox"/> Nasal intubation<br><input type="checkbox"/> Surgical airway                                                                                                                                                           |

**9) Best Cormack – Lehane – score** (Grade 1-4) \_\_\_\_\_

**10) Numbers of airway management attempts** \_\_\_\_\_

**11) Number of airway management devices used** \_\_\_\_\_

**12) Final method used for airway management** (only one check, please)

|                         |                                                                                                                                                                                                                                                 |
|-------------------------|-------------------------------------------------------------------------------------------------------------------------------------------------------------------------------------------------------------------------------------------------|
| Spontaneous respiration | <input type="checkbox"/> No assistance (with / without supplementary O <sub>2</sub> )<br><input type="checkbox"/> With chin-lift or jaw-trust<br><input type="checkbox"/> With oropharyngeal- / nasopharyngeal airway                           |
| Bag-mask-ventilation    | <input type="checkbox"/> Without adjuncts<br><input type="checkbox"/> With oropharyngeal- / nasopharyngeal airway                                                                                                                               |
| Laryngeal mask          | <input type="checkbox"/> Standard<br><input type="checkbox"/> Intubation laryngeal mask ("Fasttrach")                                                                                                                                           |
| Oral intubation         | <input type="checkbox"/> Standard laryngoscopy without stylet<br><input type="checkbox"/> Standard laryngoscopy with stylet<br><input type="checkbox"/> Standard laryngoscopy with "Gum - Elastic - Bougie"<br><input type="checkbox"/> Airtraq |
| Other                   | <input type="checkbox"/> Nasal intubation<br><input type="checkbox"/> Surgical airway                                                                                                                                                           |

**13) Post- interventional ventilations mode** (only one check, please)

|                                                                     |                                                                                                                                         |
|---------------------------------------------------------------------|-----------------------------------------------------------------------------------------------------------------------------------------|
| <input type="checkbox"/> Spontaneous ventilation                    |                                                                                                                                         |
| <input type="checkbox"/> Controlled ventilation                     | <input type="checkbox"/> Manual ventilation<br><input type="checkbox"/> Automated ventilator<br><input type="checkbox"/> Both the above |
| <input type="checkbox"/> Mixed spontaneous / controlled ventilation |                                                                                                                                         |

**14) Drugs used during airway management** (more than one alternative may be checked)

|                                                       |
|-------------------------------------------------------|
| <input type="checkbox"/> Thiopental                   |
| <input type="checkbox"/> Propofol                     |
| <input type="checkbox"/> Midazolam                    |
| <input type="checkbox"/> S-Ketamine                   |
| <input type="checkbox"/> Fentanyl                     |
| <input type="checkbox"/> Alfentanil                   |
| <input type="checkbox"/> Morphine                     |
| <input type="checkbox"/> Suxametonium                 |
| <input type="checkbox"/> Rocuronium                   |
| <input type="checkbox"/> Ephedrine                    |
| <input type="checkbox"/> Lidocain                     |
| <input type="checkbox"/> Other (please specify) _____ |
| <input type="checkbox"/> None                         |

**15) Complications related to airway management** (more than one alternative may be checked)

- None
- Surgical airway necessary
- Accidental intubation of the oesophagus
- Accidental intubation of right main stem bronchus
- Dental trauma
- Vomiting
- Aspiration
- Hypoxia ( $\text{SpO}_2 < 90\%$ )
- Bradycardia (heart rate  $< 60/\text{min.}$ )
- Hypotension (systolic blood pressure  $< 90 \text{ mmHg}$ )
- Other (please specify) \_\_\_\_\_  
\_\_\_\_\_  
\_\_\_\_\_

**16) First post-intervention vital signs**

ETCO<sub>2</sub> \_\_\_\_\_ kPa  
SpO<sub>2</sub> \_\_\_\_\_ %  
Respiratory rate \_\_\_\_\_ /min  
Heart rate \_\_\_\_\_ /min  
Systolic blood pressure \_\_\_\_\_ mmHg

**17) Vital signs upon arrival at the emergency department**

ETCO<sub>2</sub> \_\_\_\_\_ kPa  
SpO<sub>2</sub> \_\_\_\_\_ %  
Respiratory rate \_\_\_\_\_ /min  
Heart rate \_\_\_\_\_ /min  
Systolic blood pressure \_\_\_\_\_ mmHg

**18) Pre-hospital outcome**

- Pre-hospital death (declared dead by pre-hospital critical care team physician)
- Patient alive upon arrival at the emergency department (including patients with ongoing CPR)

**19) Pre-hospital advanced airway management not performed**

Did you consider performing pre-hospital advanced airway management but decided against it?

- Yes
- No

**If yes**, what was the reason? (more than one alternative may be checked)

- Expected difficult airway management
- Difficult access to the patient
- Short distances to the emergency department
- Patient's condition
- Patient's co-morbidity
- Lack of training / experience
- Lack of appropriate equipment
- Lack of necessary assistance
- Other \_\_\_\_\_  
\_\_\_\_\_  
\_\_\_\_\_  
\_\_\_\_\_

**20) Comments:**

\_\_\_\_\_  
\_\_\_\_\_  
\_\_\_\_\_  
\_\_\_\_\_  
\_\_\_\_\_  
\_\_\_\_\_

**Thank you very much for you collaboration!**
